# Supplementary material
Source: HighWire-hosted journal article supplement (https://www.jneurosci.org/highwire/filestream/599672/field_highwire_adjunct_files/1/Figure_S2.pdf)
Supplement: Figure_S2.pdf [file Figure_S2.pdf]

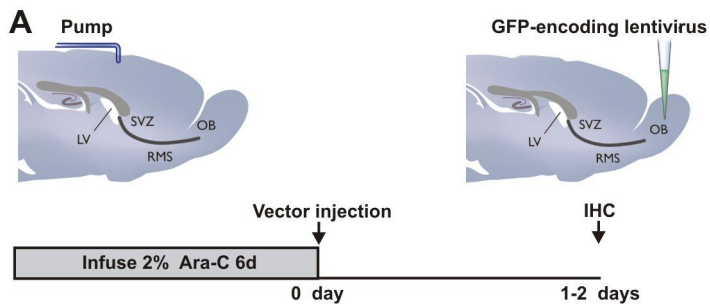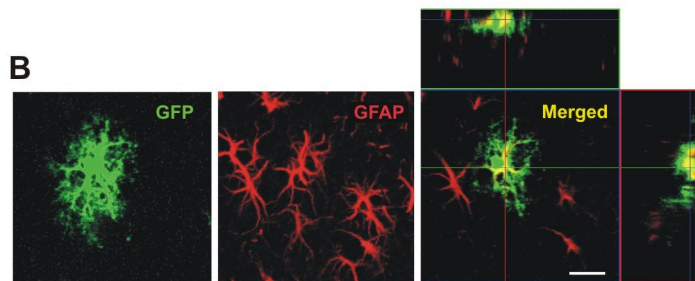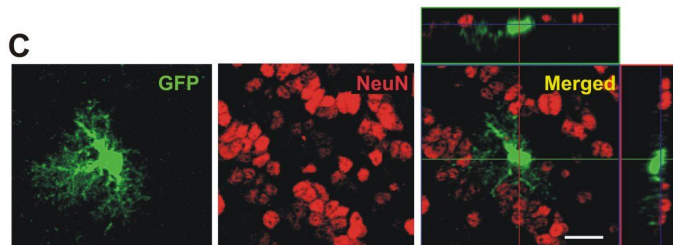

**D**

| Quantitative confocal analysis of double staining |                  |              |          |
|---------------------------------------------------|------------------|--------------|----------|
|                                                   | GFAP/GFP         | PSA-NCAM/GFP | NeuN/GFP |
| Inj Site (%)                                      | 13.9 ± 9.2 (209) | ND (209)     | ND (114) |
